# Supplementary figures and images for: Ginsenoside Rk1 improves endothelial function in diabetes through activating peroxisome proliferator-activated receptors
Source: Royal Society of Chemistry journal article supplement (doi:10.1039/d3fo05222b), 2024-01-01

**Figure 2**

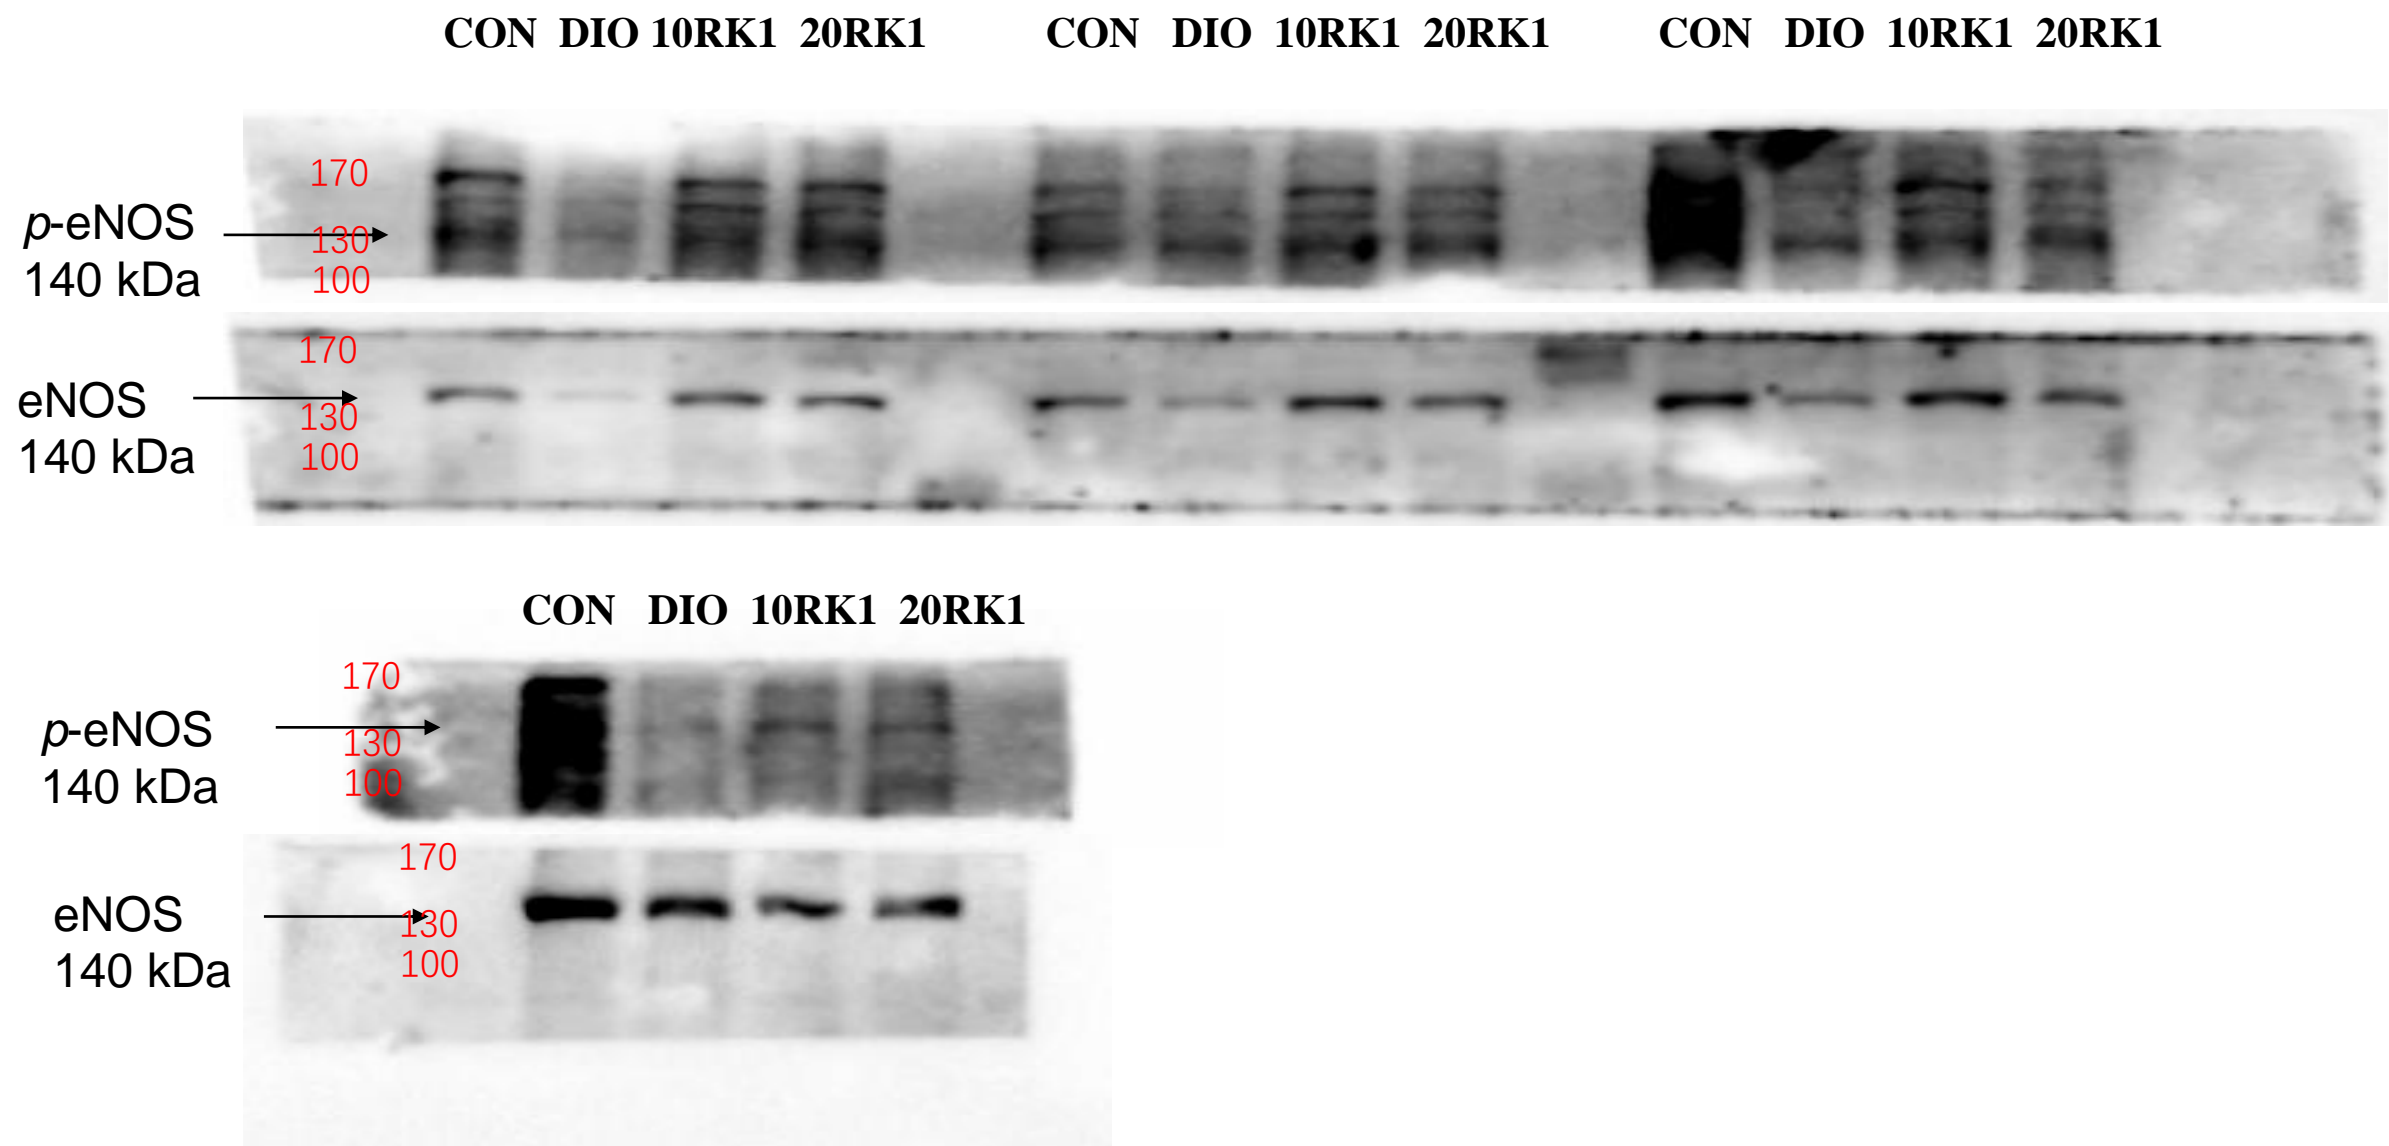

**Figure 2**

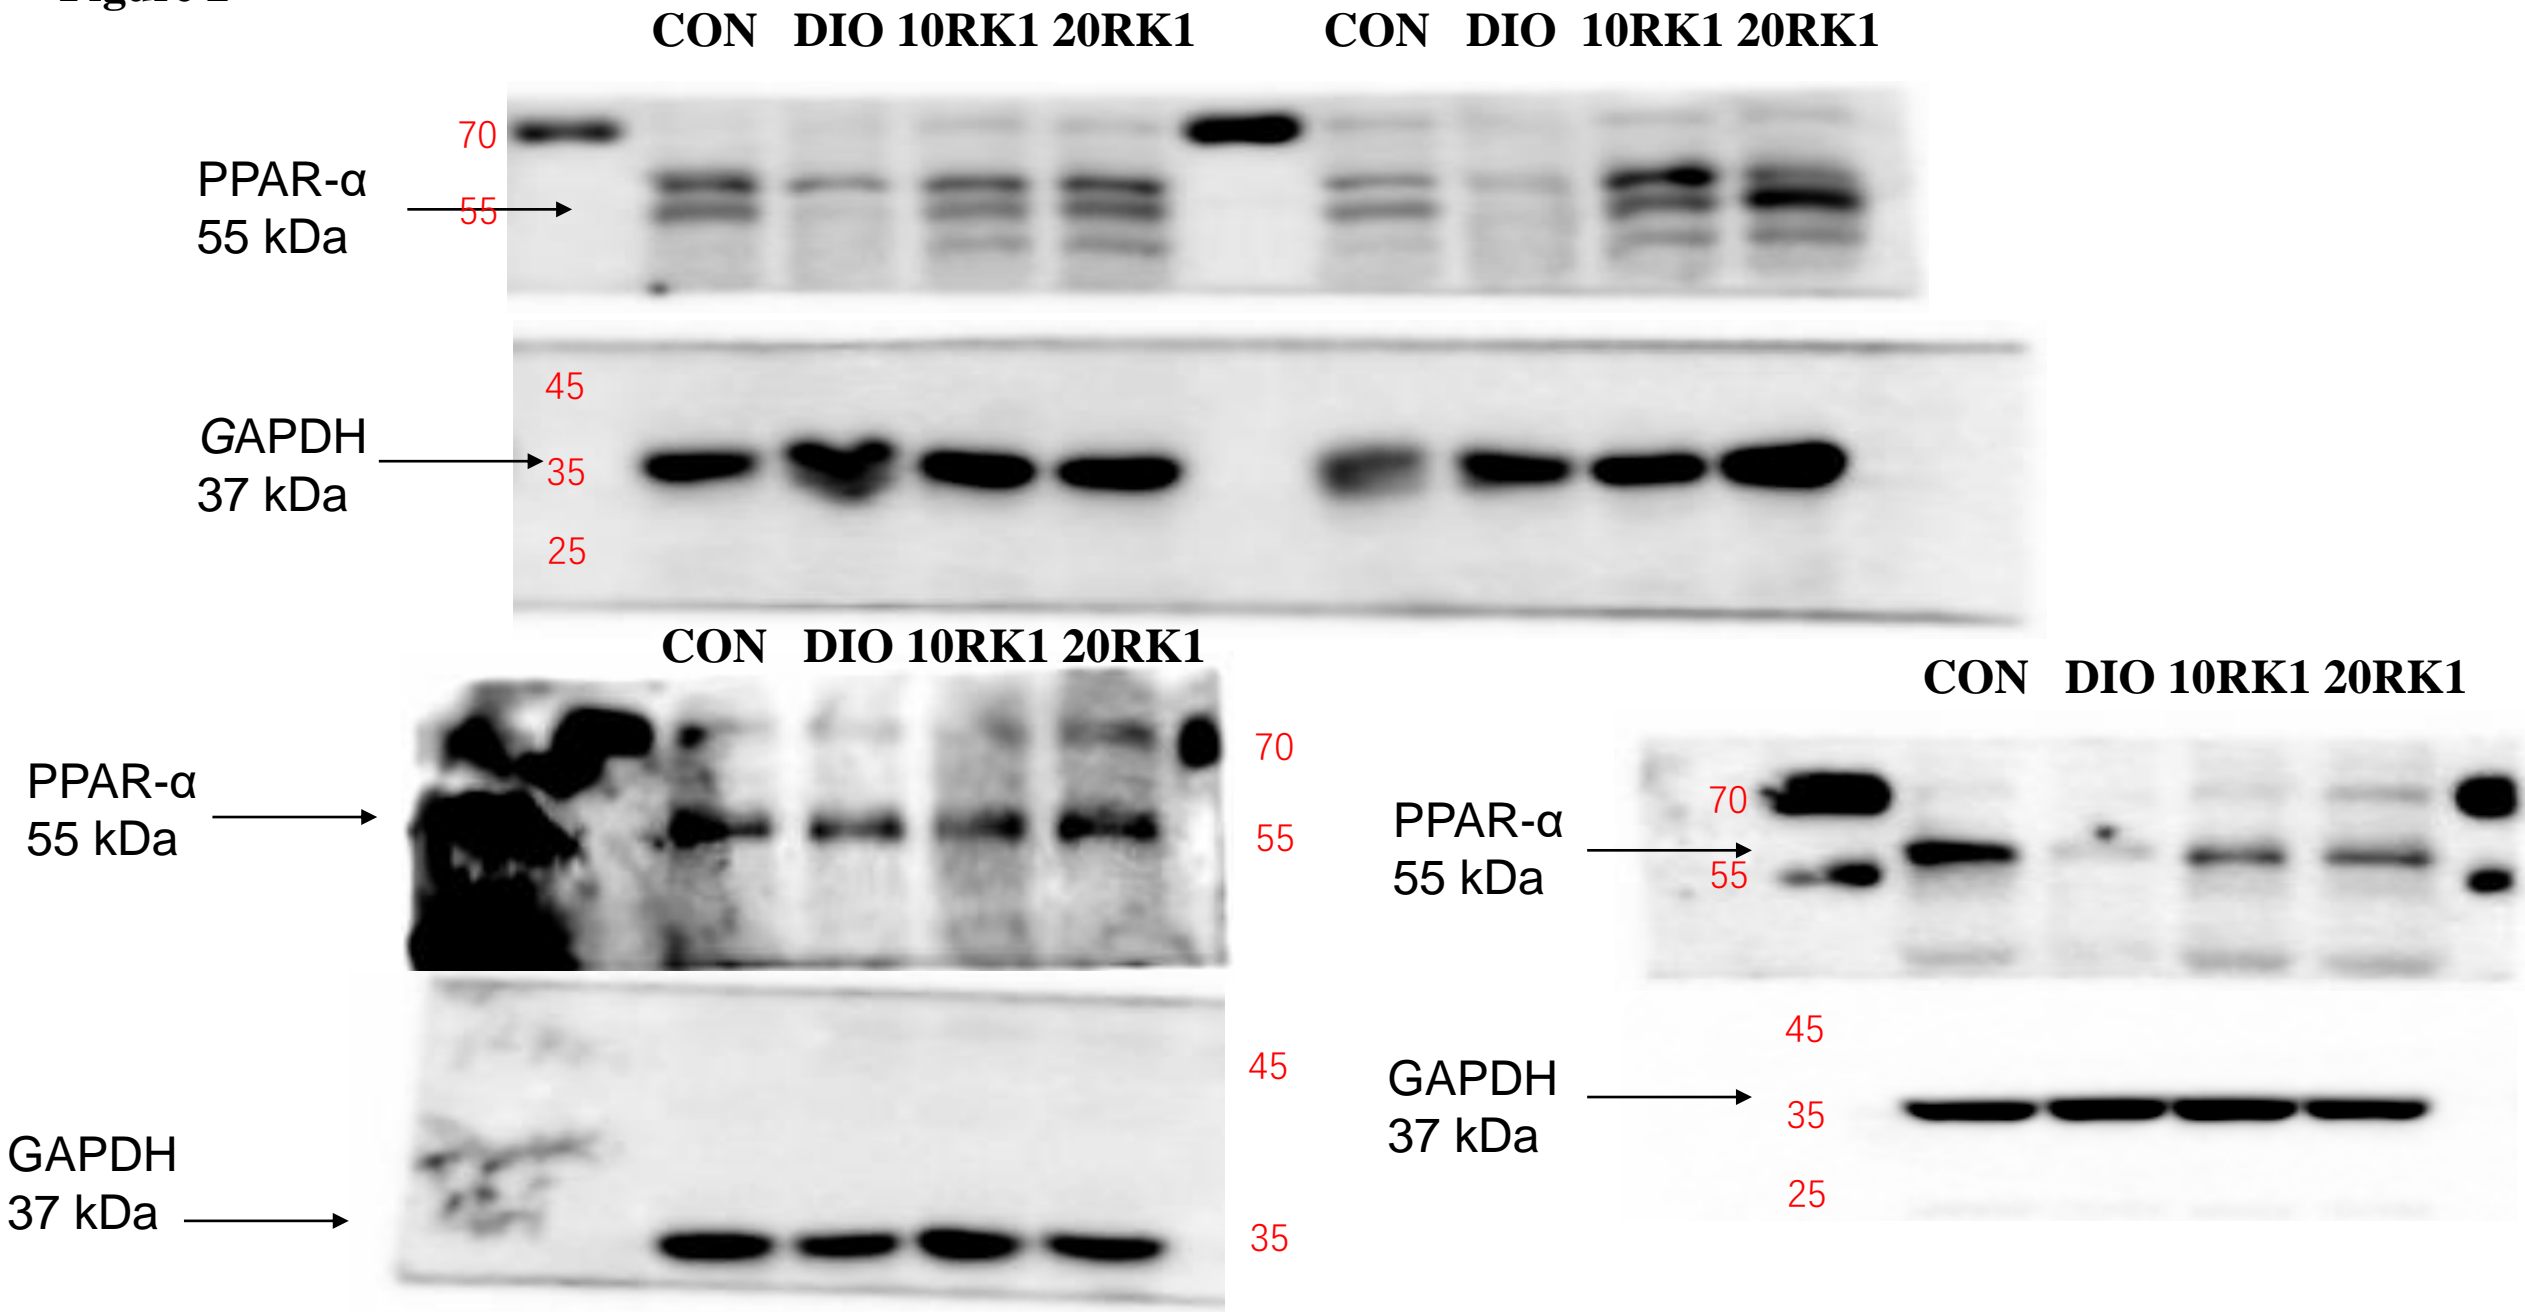

**Figure 2**

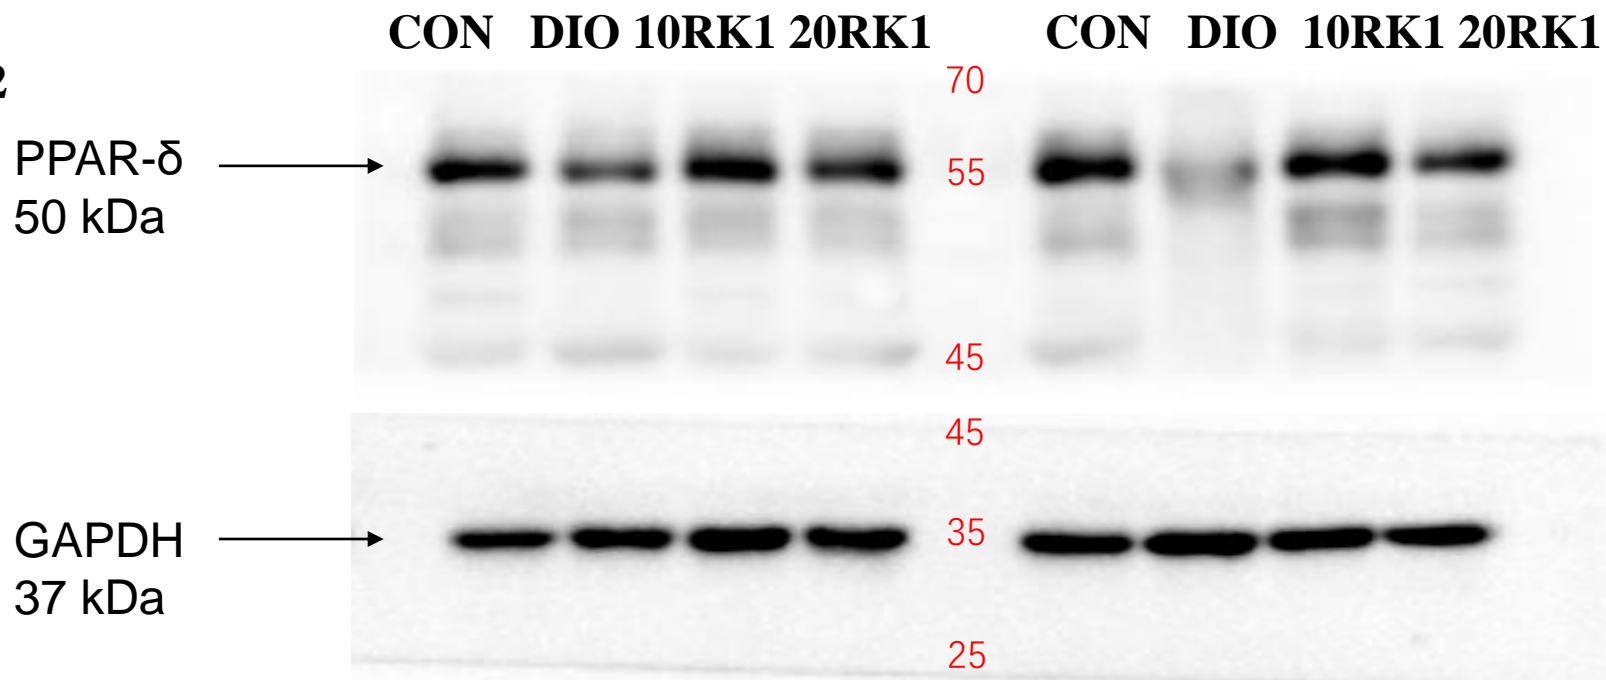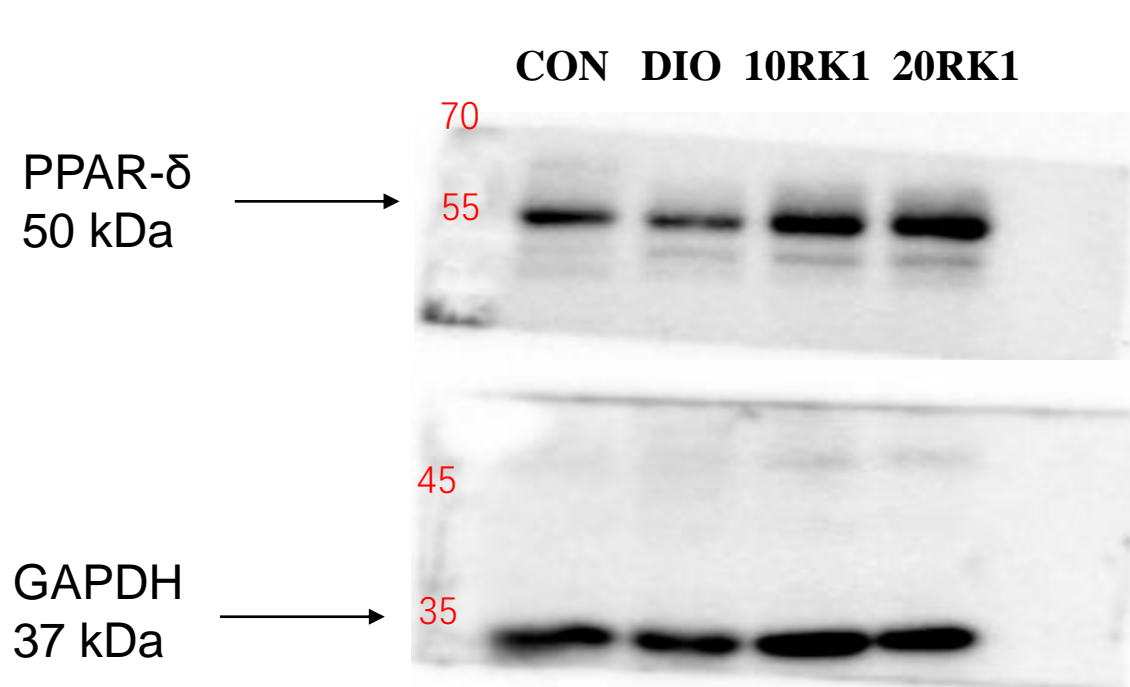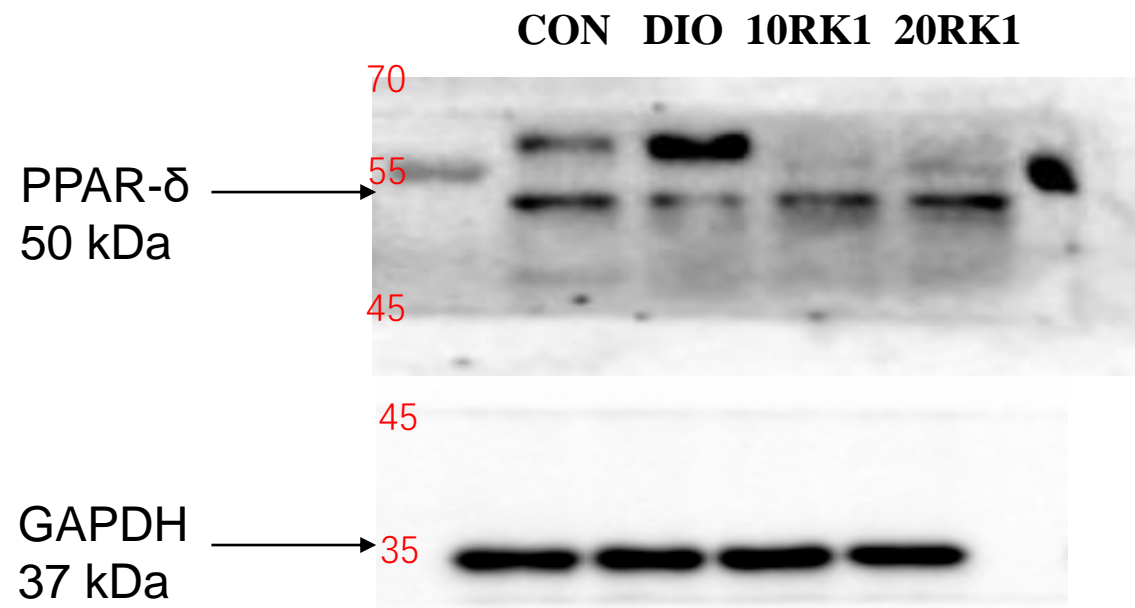

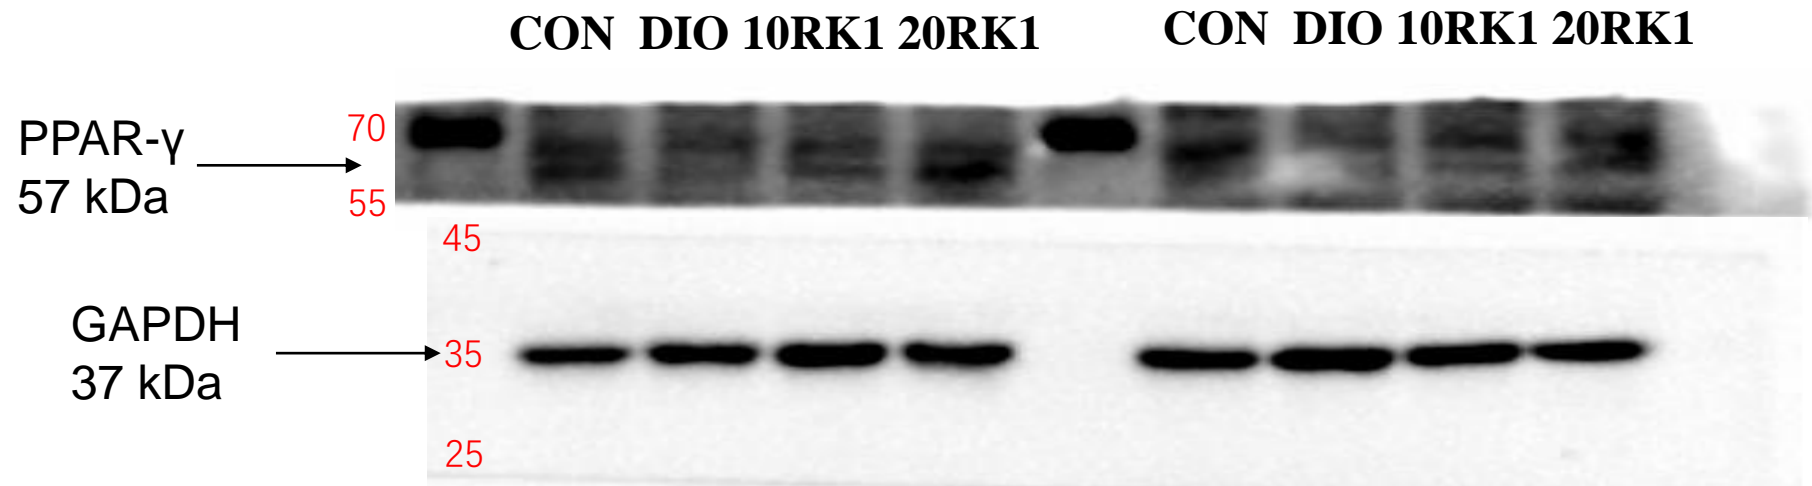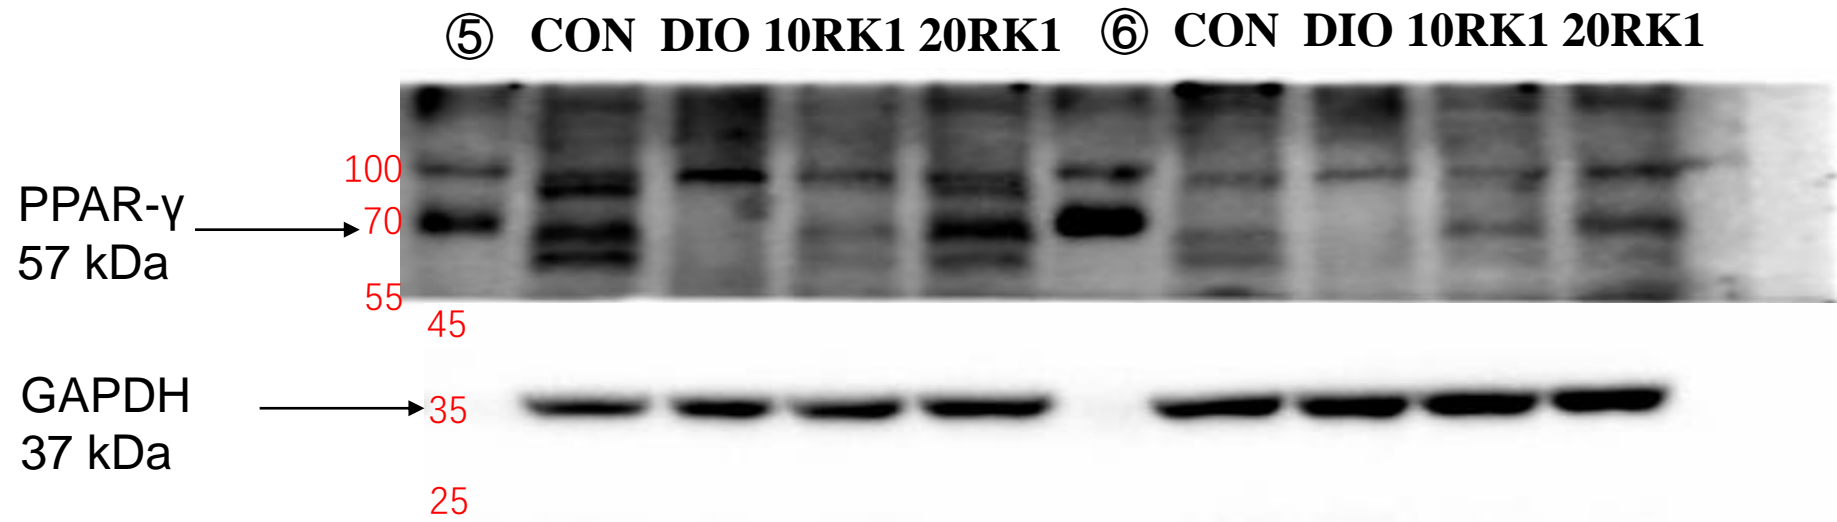

Figure 4

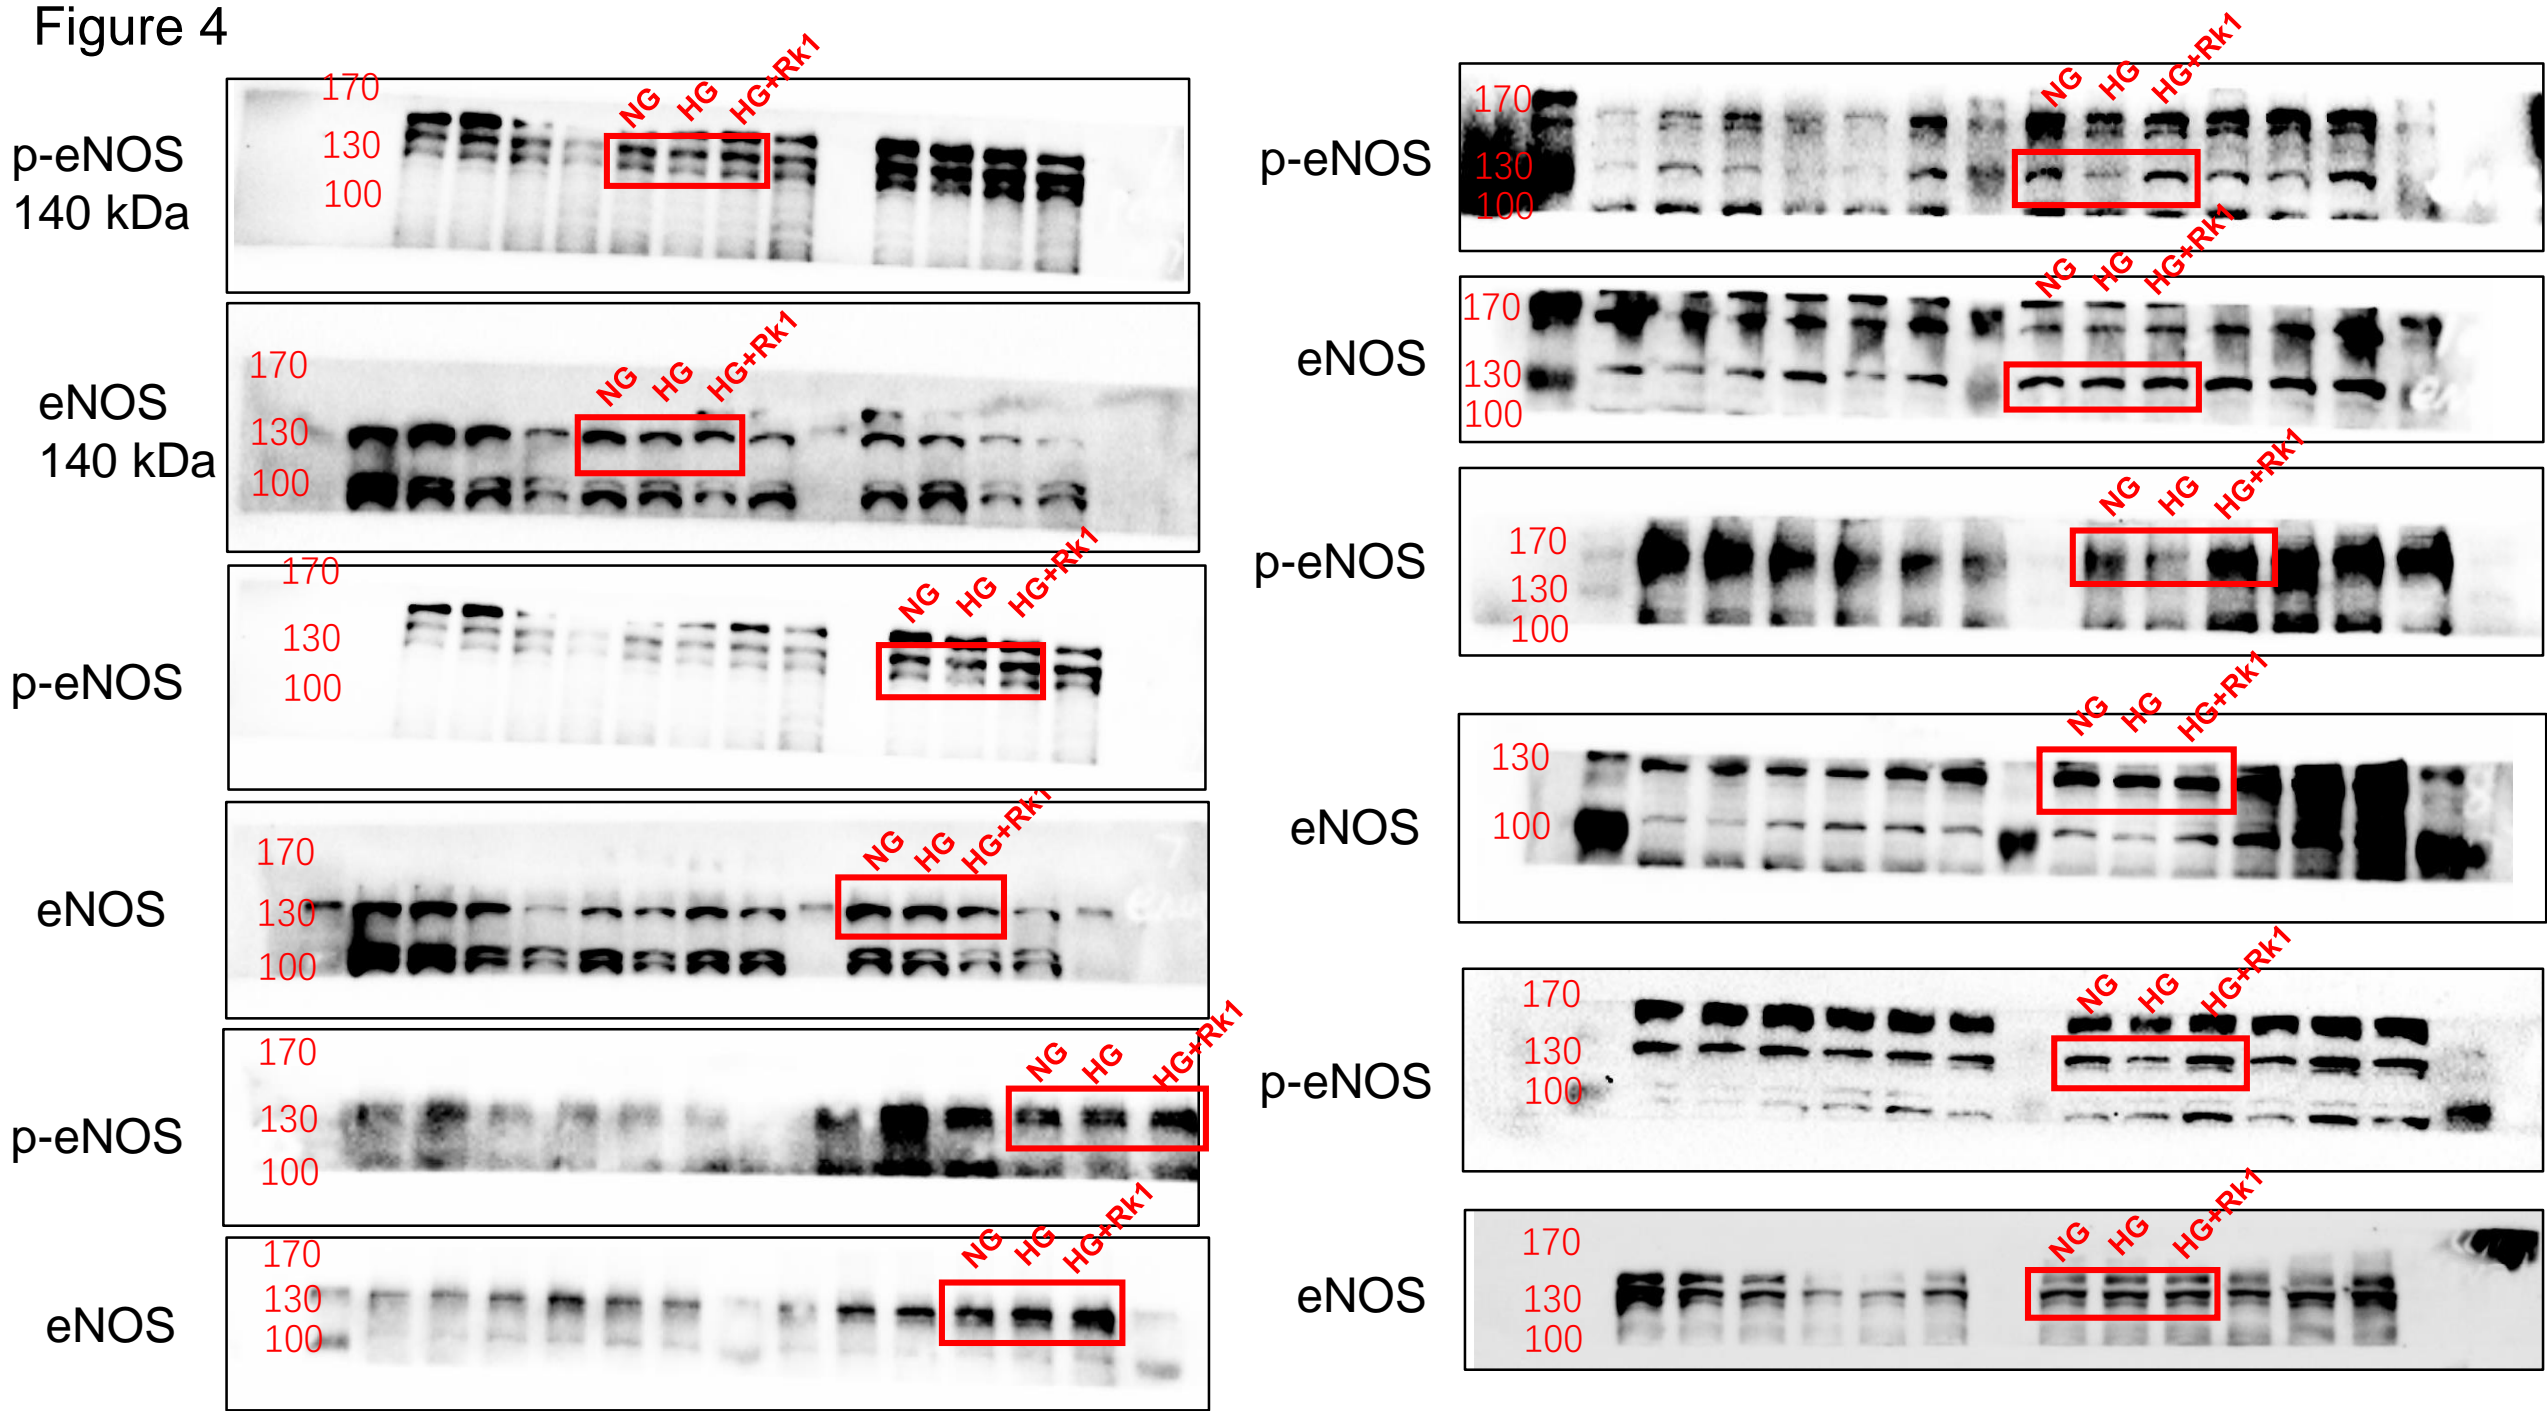

Figure 4

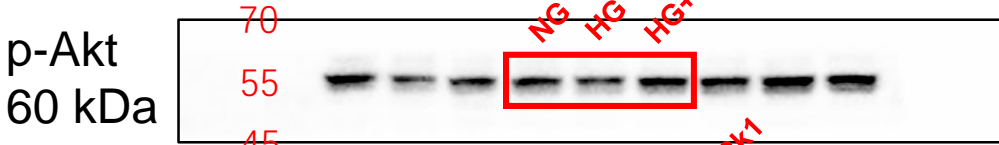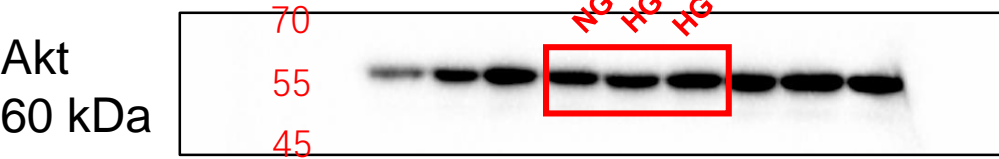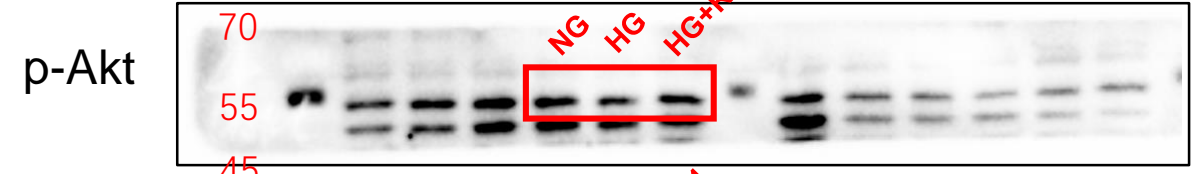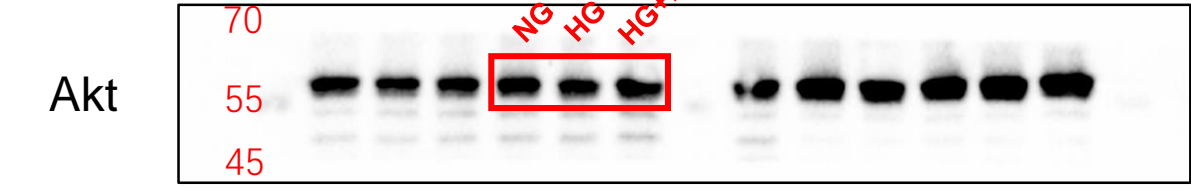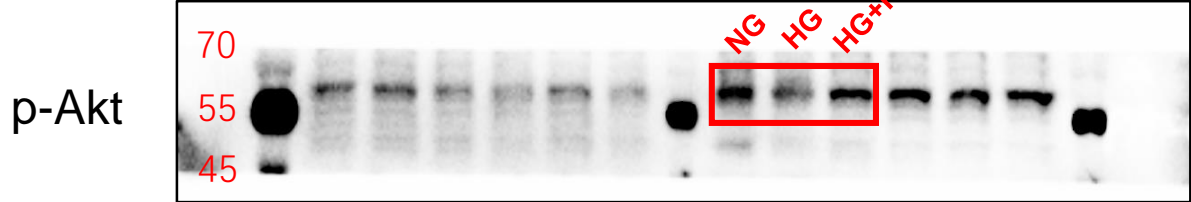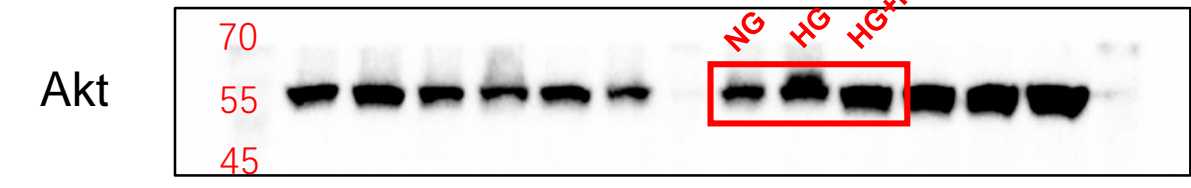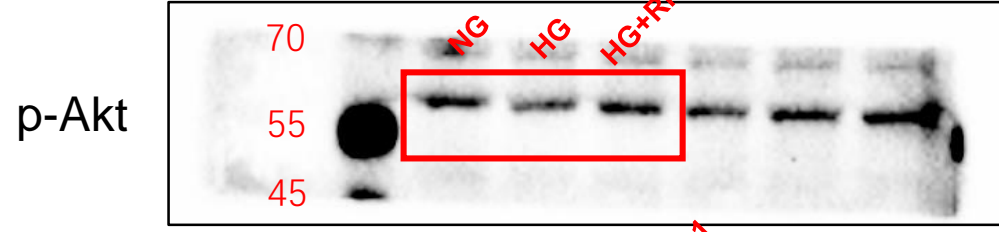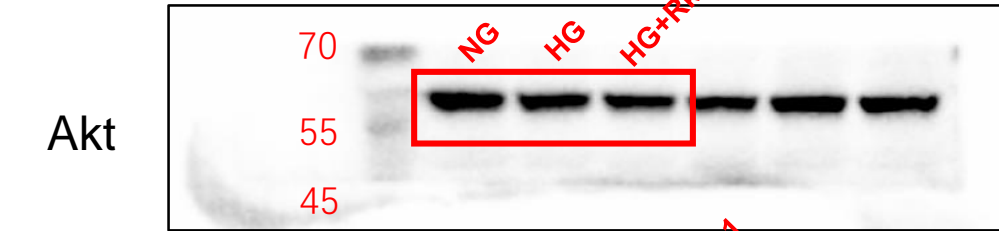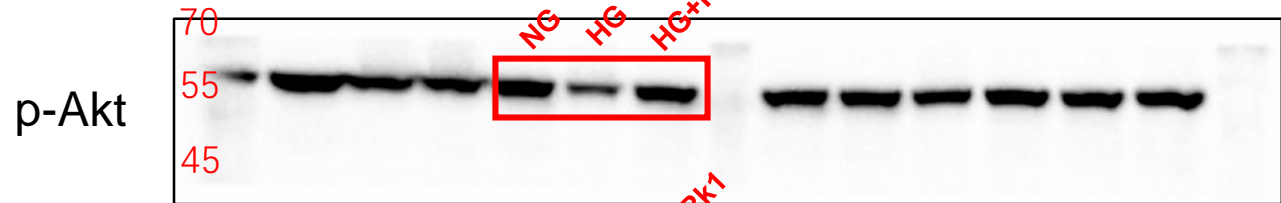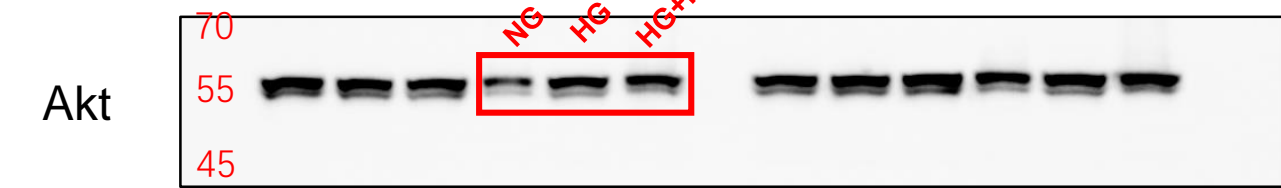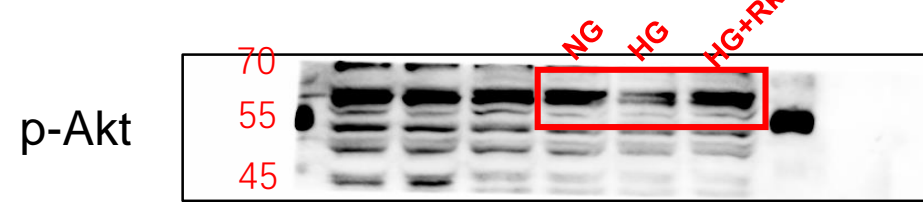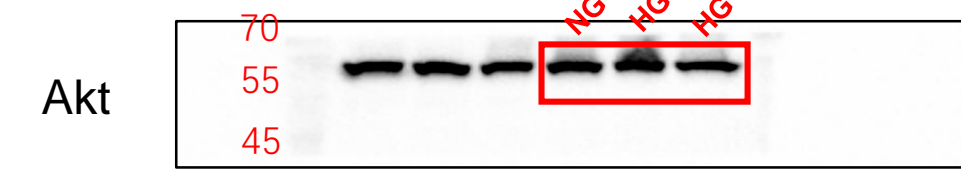

Figure 4

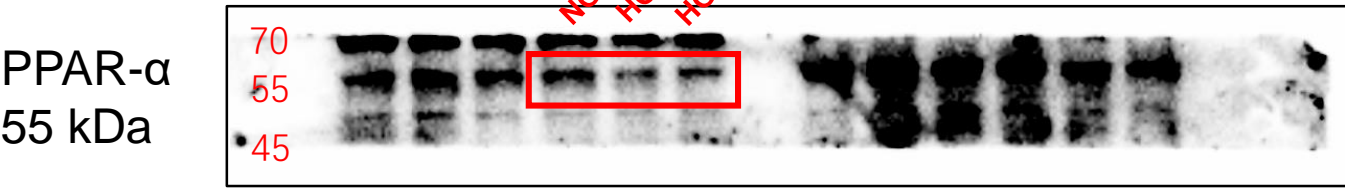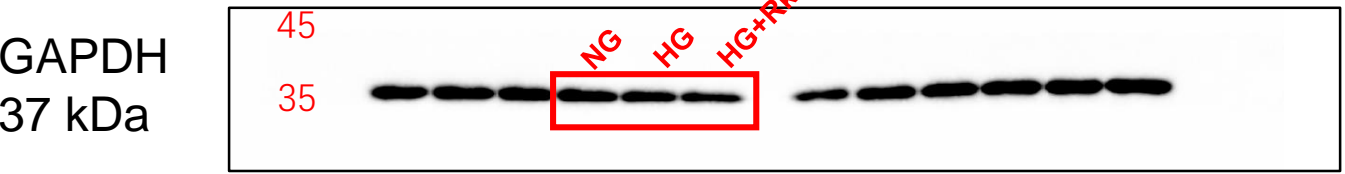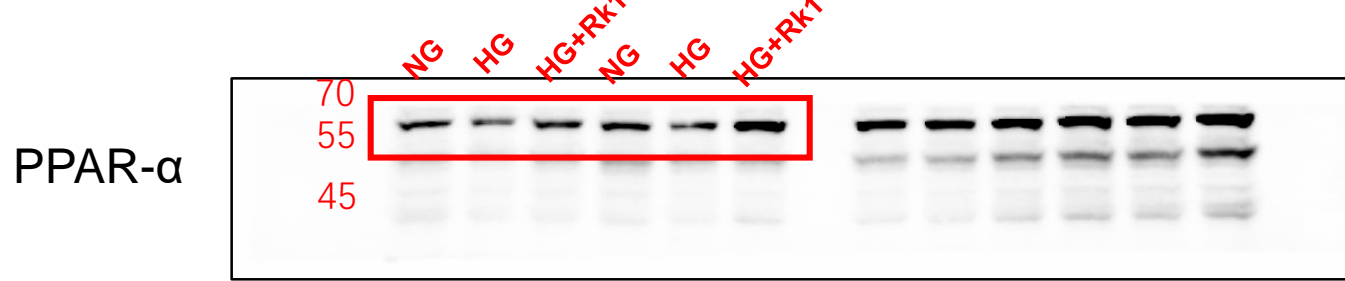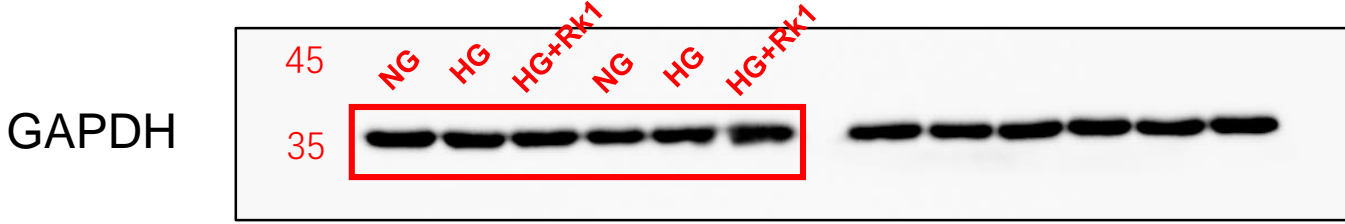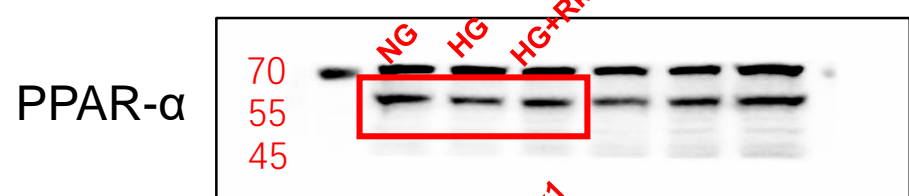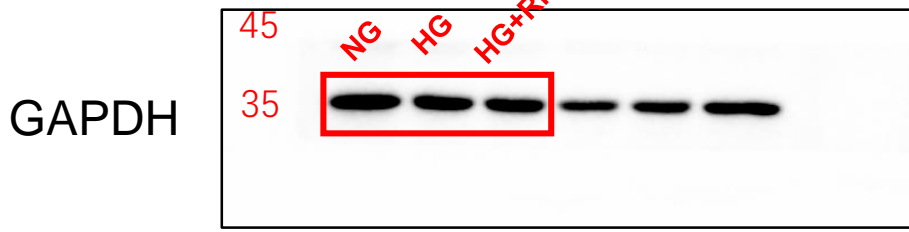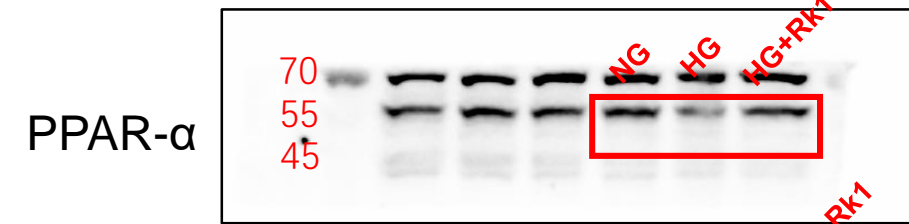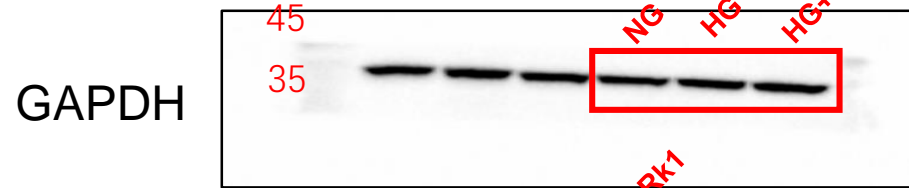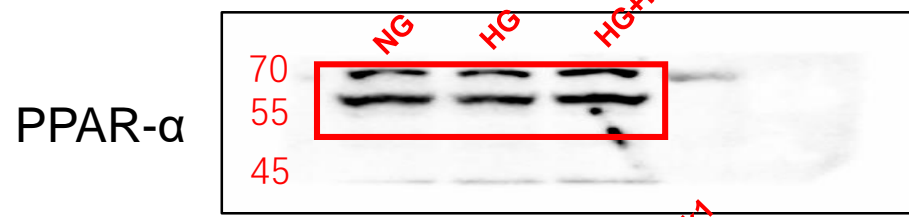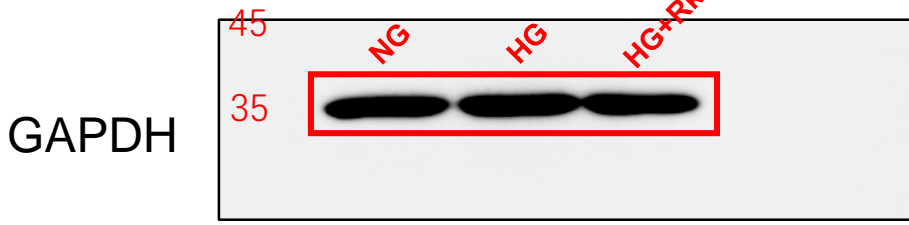

Figure 4

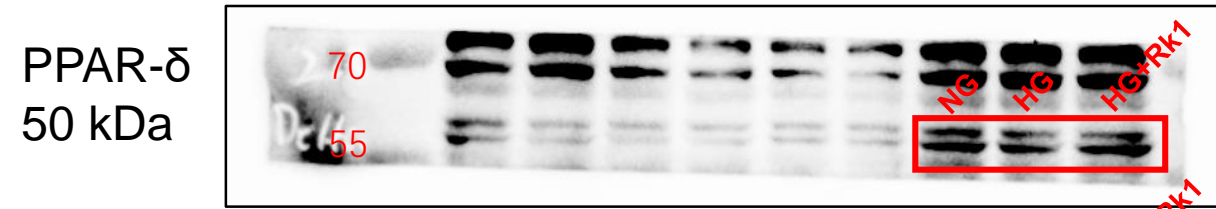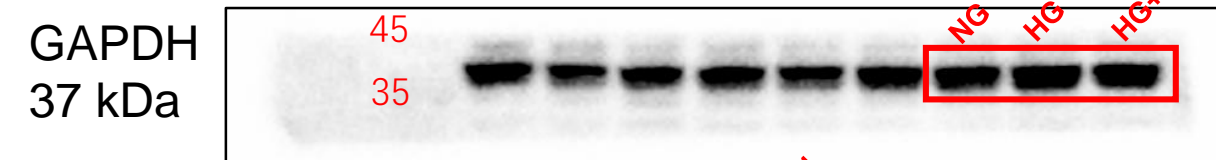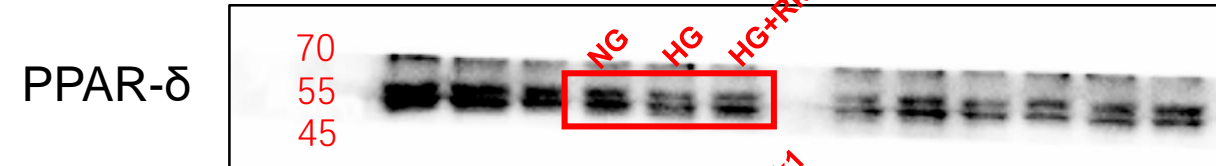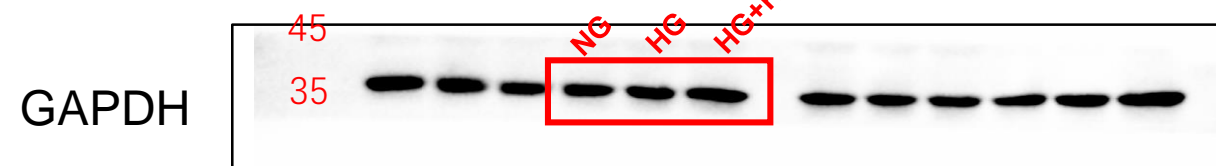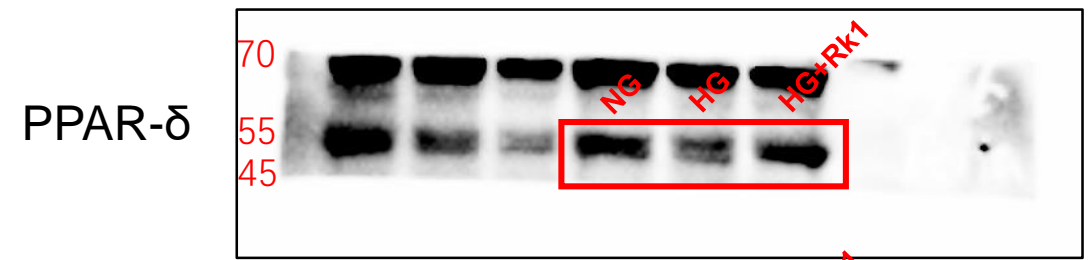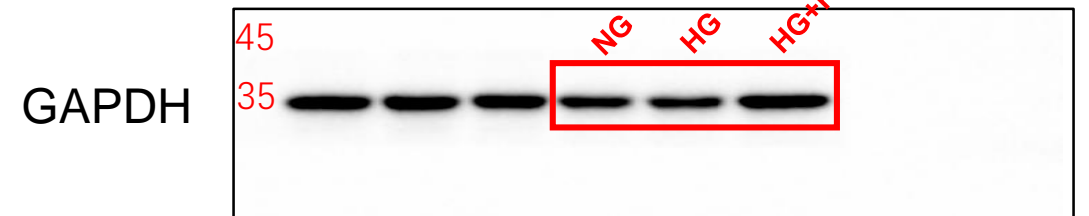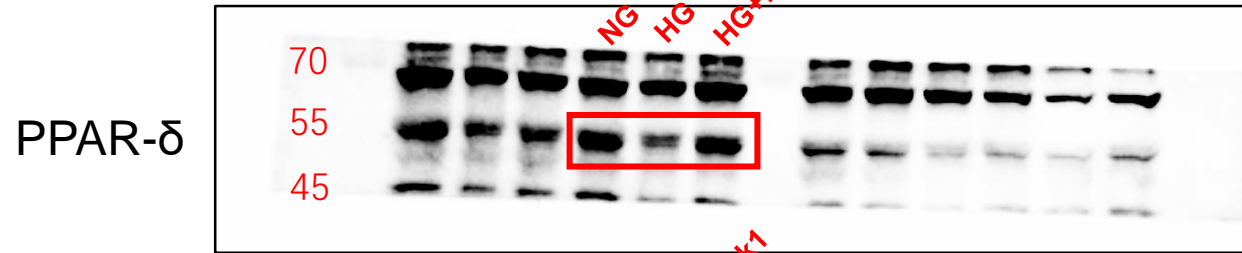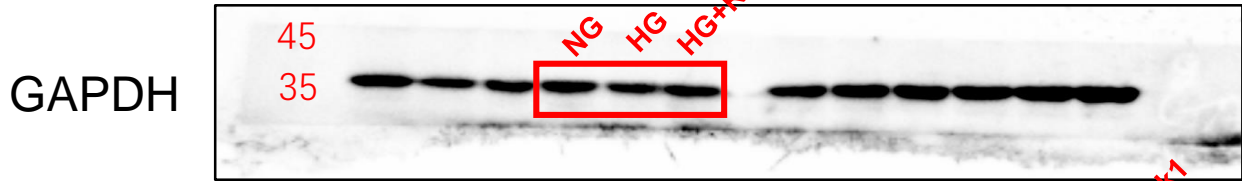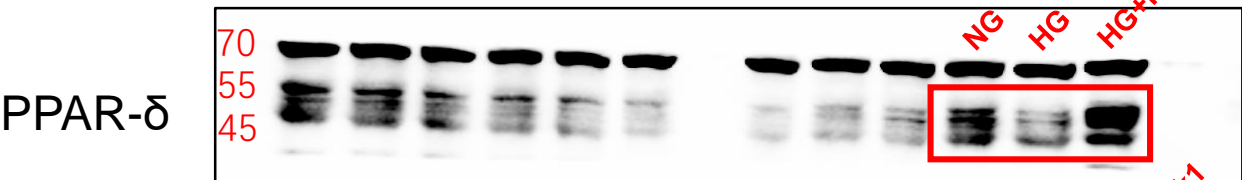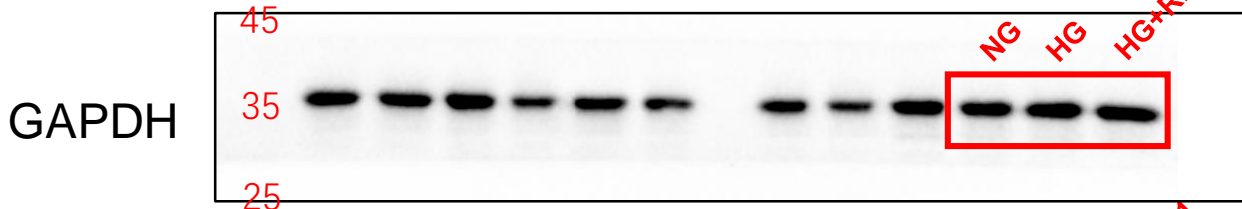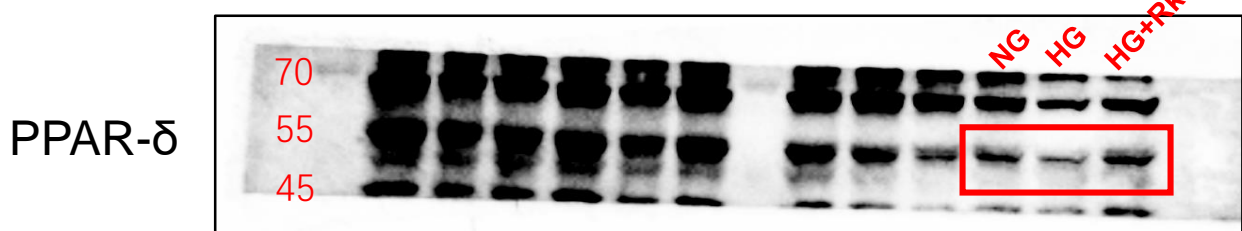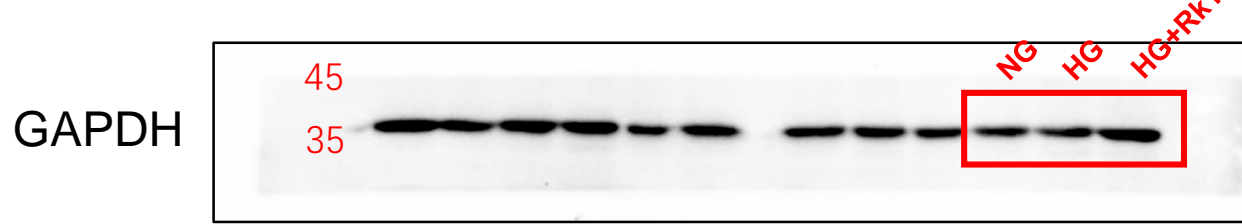



Figure 4

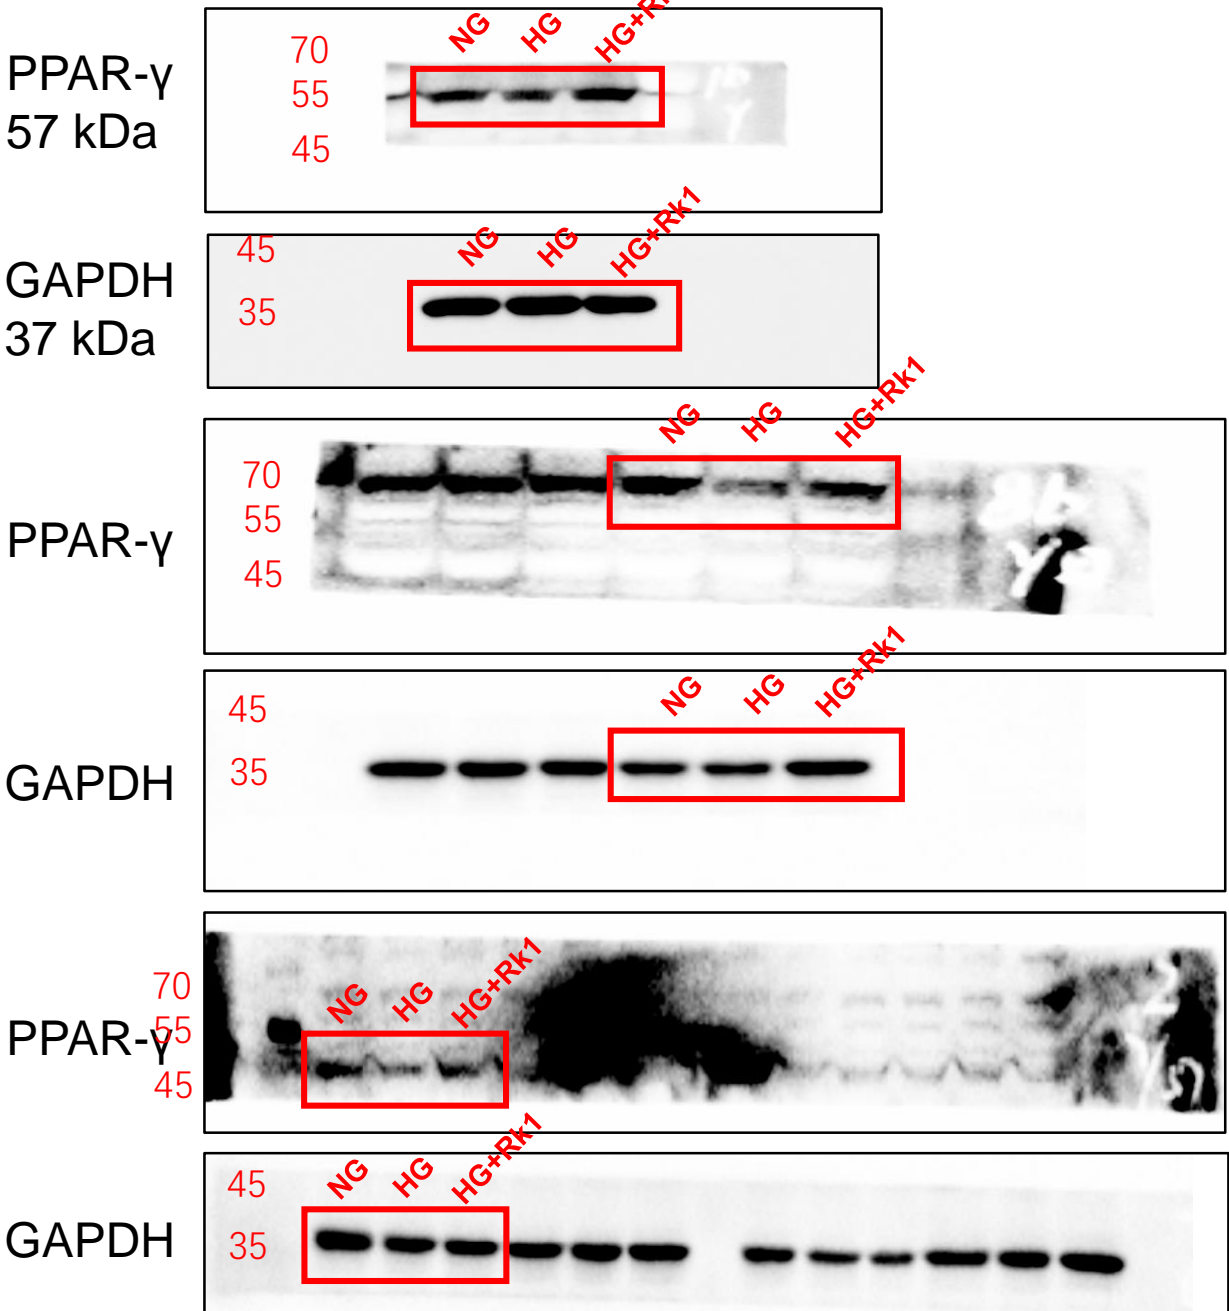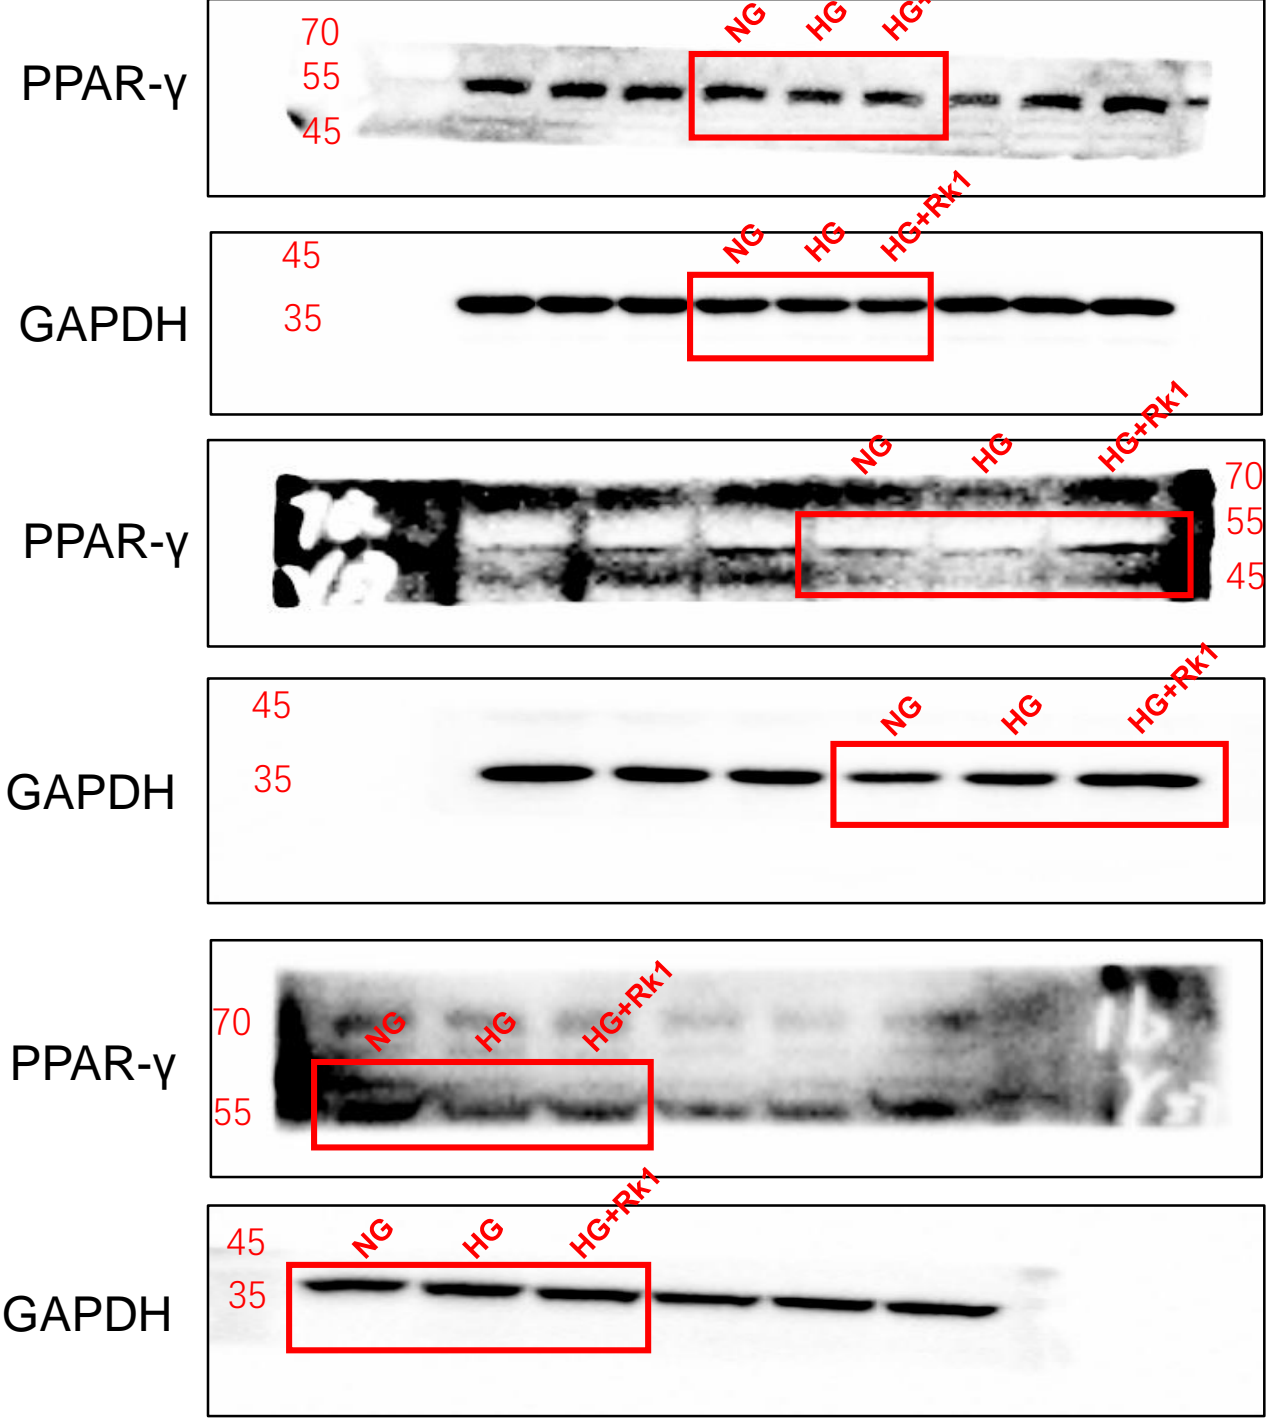

Figure 4A.

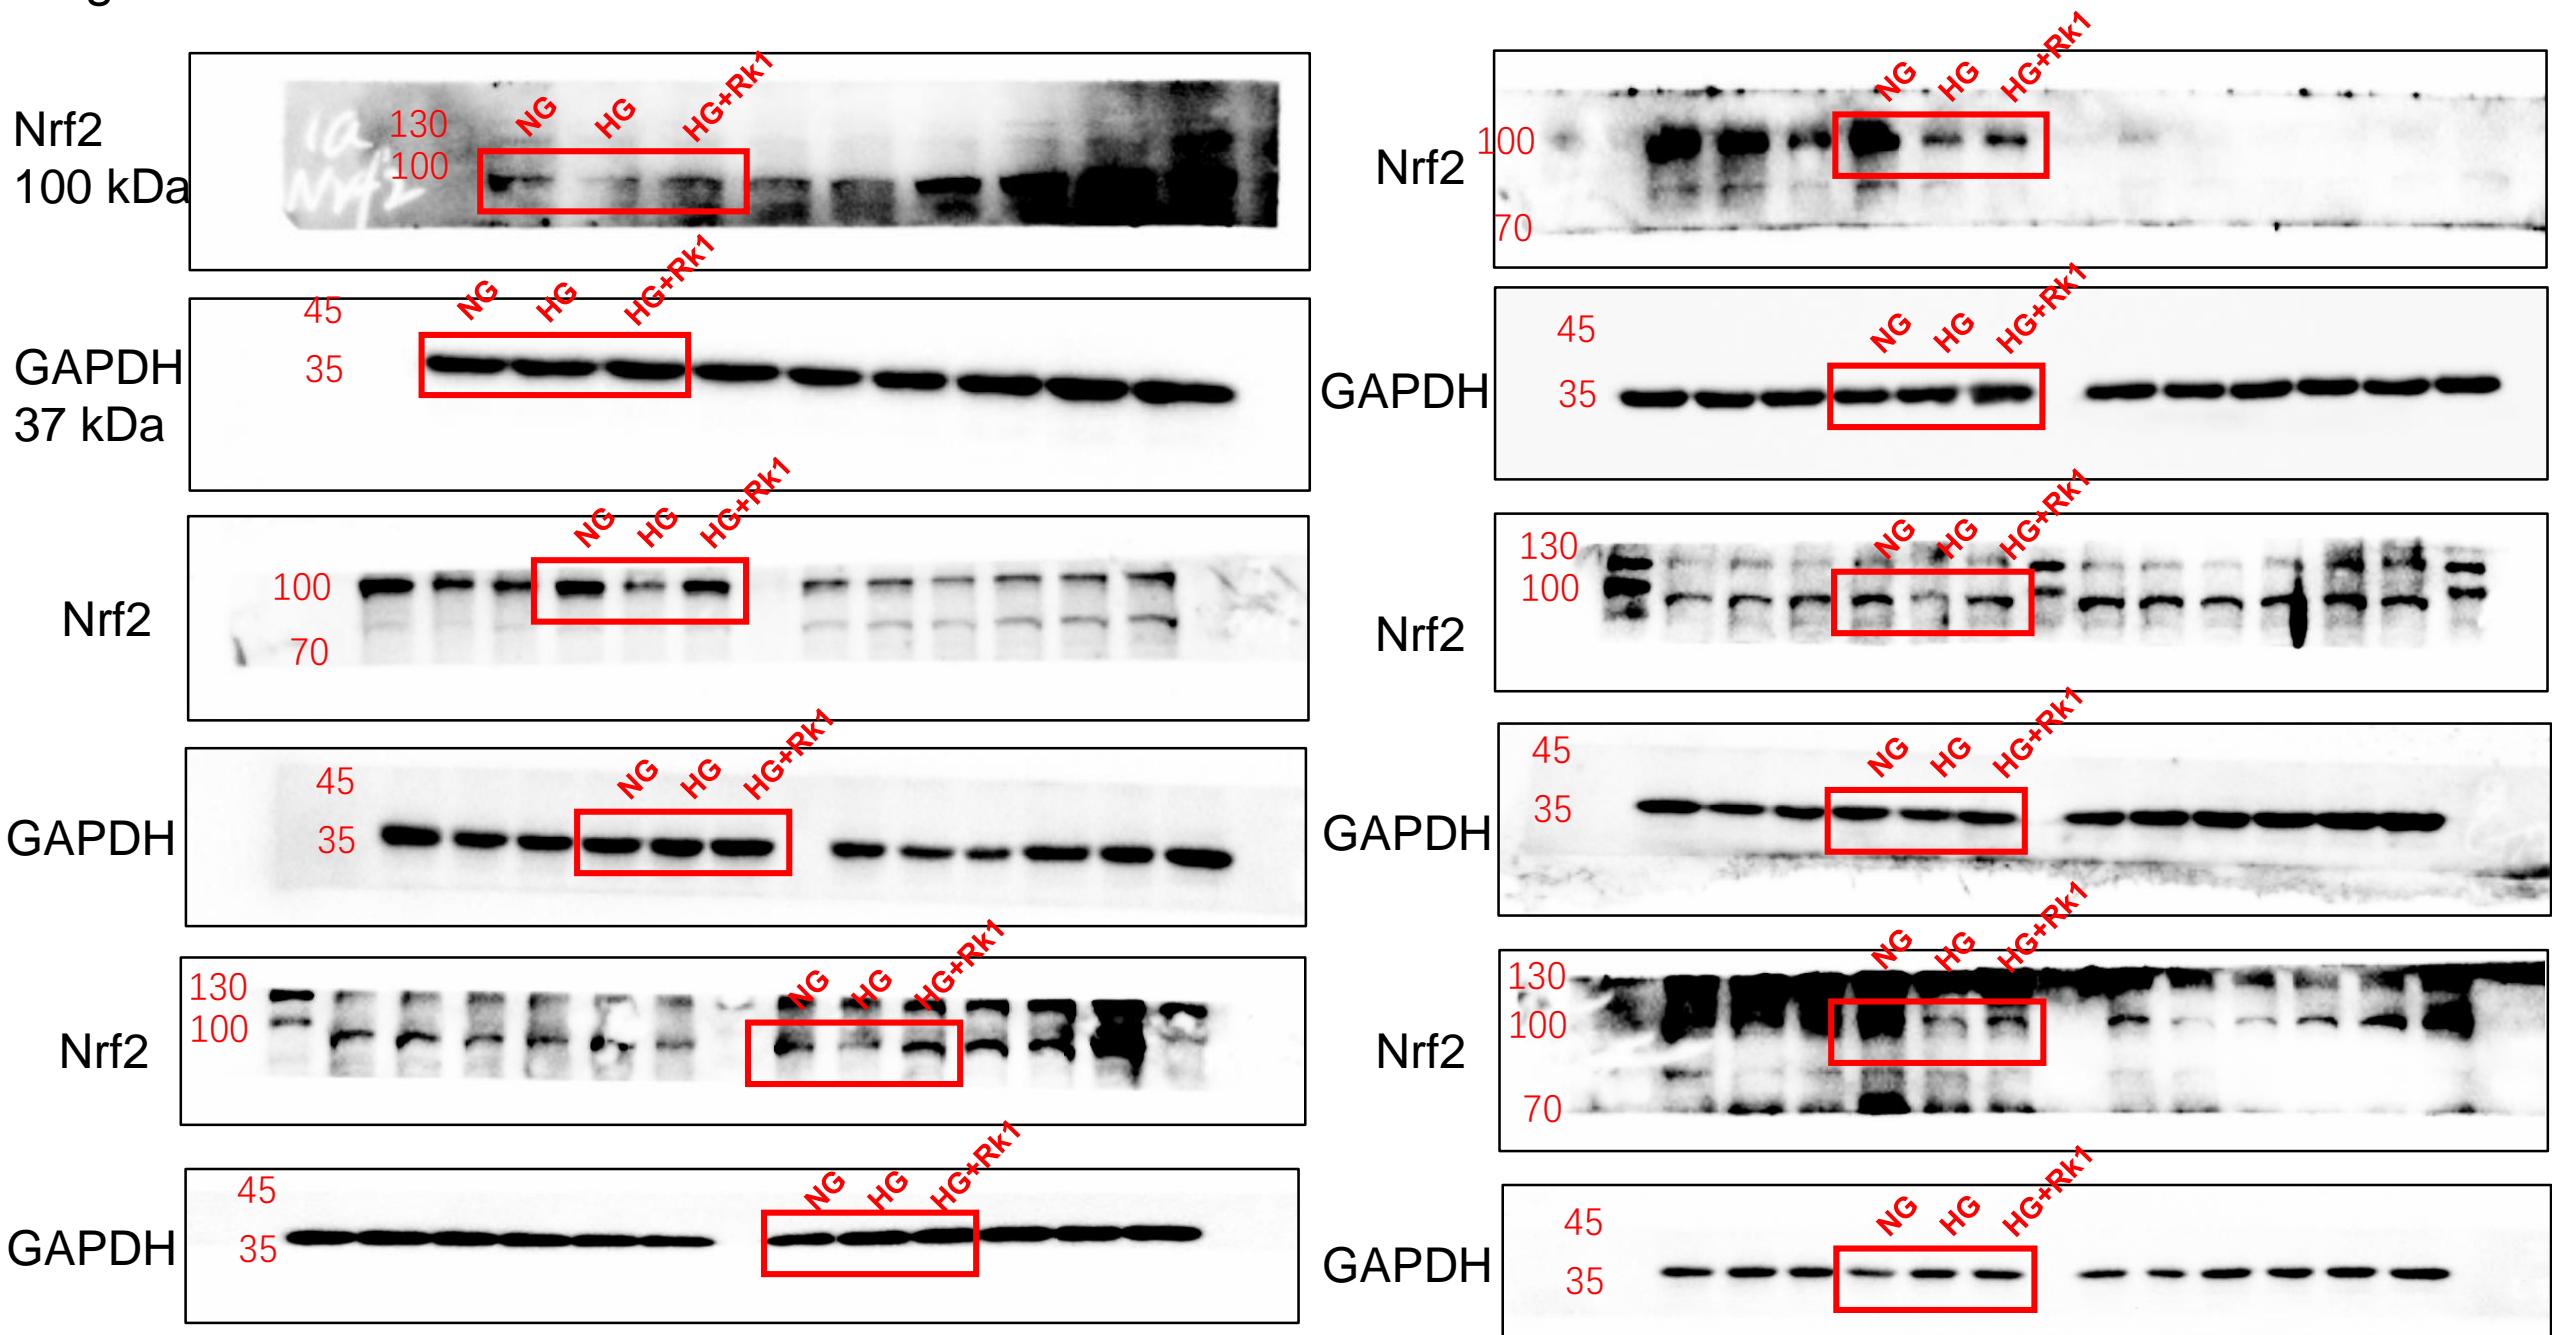

Figure 4A.

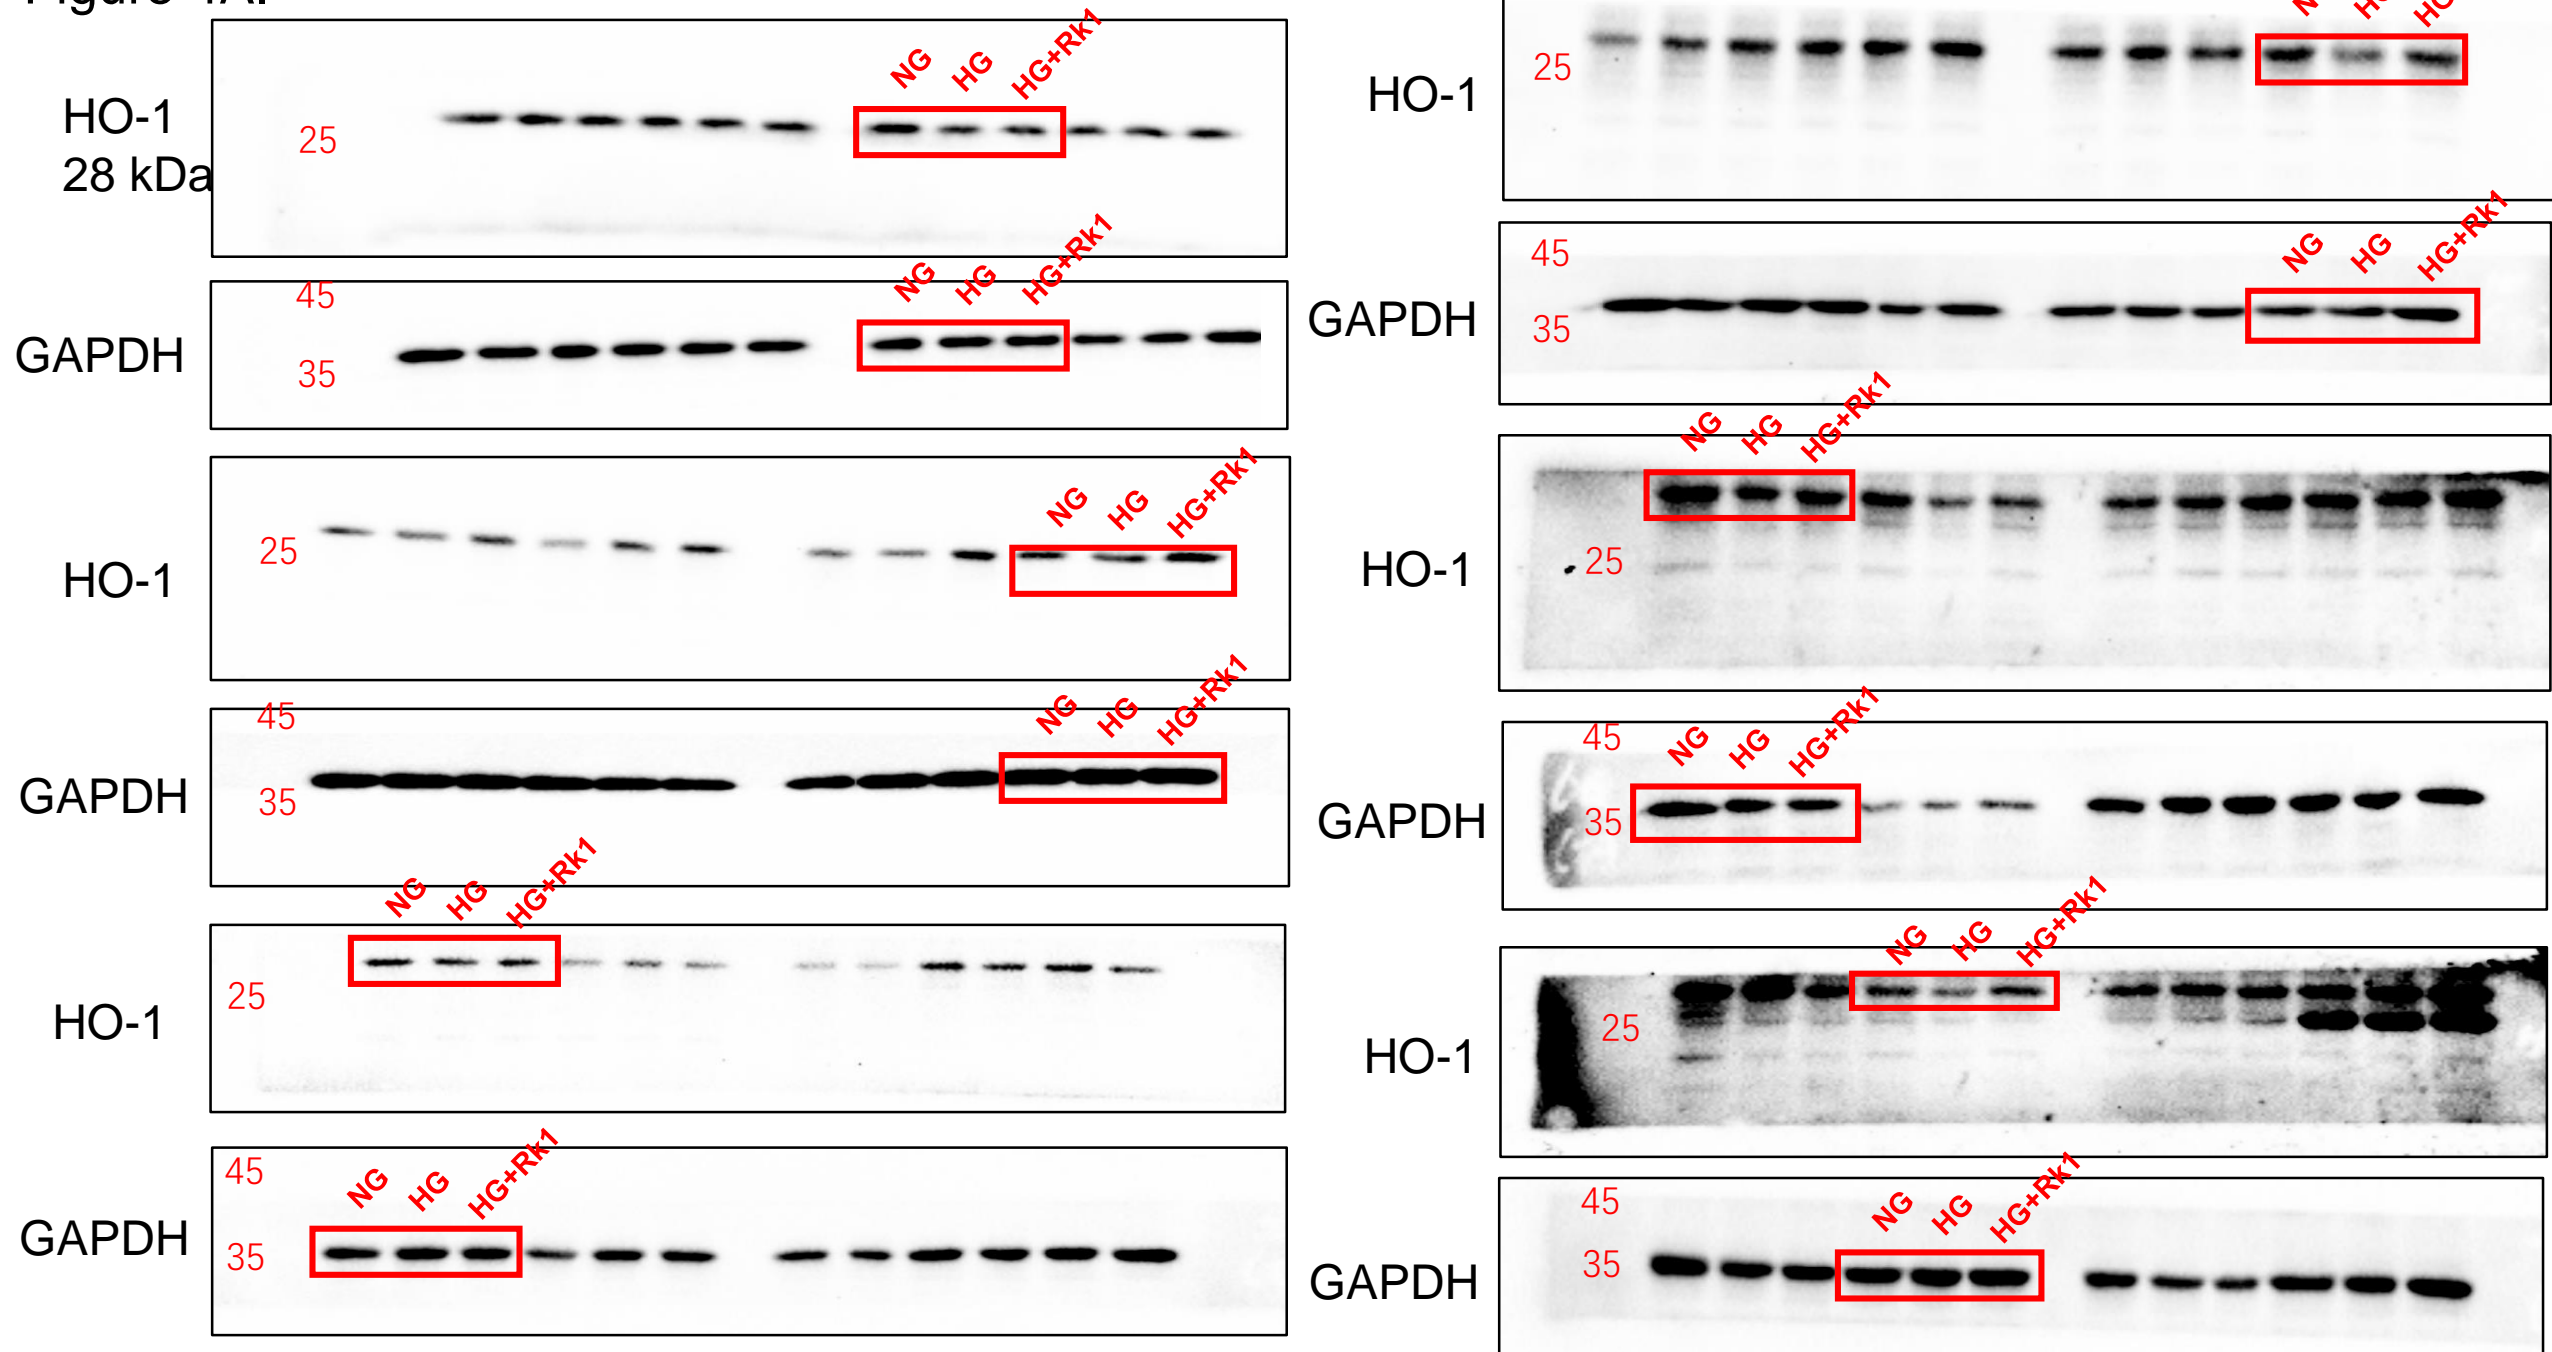

Supplement: d3fo05222b1.pdf [file d3fo05222b1.pdf]
